# Supplementary material for: Knowledge, Perceptions and Attitudes toward Chronic Pain and Its Management: A Cross-Sectional Survey of Frontline Pharmacists in Ontario, Canada
Source: PLoS One. 2016 Jun 7;11(6):e0157151. doi: 10.1371/journal.pone.0157151 (PMC4896448; doi:10.1371/journal.pone.0157151)
Supplement: S1 File — (XLSX) [file pone.0157151.s001.xlsx]

## Sheet: Sheet1
Familiar with Canadian guideline	Watchful dose	dose	inadvertent overdoses	addicted	gender	years worked in Canada	Hours	population size	KLBP1	KLBP2	KLBP3	KLBP4	KLBP5	KLBP6	KLBP7	KLBP8	KHD1	KHD2	KHD3	KHD4	KHD5	KHD6	KHD7	KHD8	KPN1	KPN2	KPN3	KPN4	KPN5	KPN6	KPN7	To incorporate complementary treatment (Chronic low back pain	To incorporate complementary treatment (Chronic headache disorders	To incorporate complementary treatment (Painful diabetic neuropathy	under-dosing Chronic low back pain	under-dosing Chronic headache disorders	under-dosing Painful diabetic neuropathy	opioids important- Chronic low back pain	opioids important- Chronic headache disorders	opioids important- Painful diabetic neuropathy	improvement -Chronic low back pain	improvement-Chronic headache disorders	improvement-Painful diabetic neuropathy	feel when approached-Chronic low back pain	feel when approached-Chronic headache disorders	feel when approached-Painful diabetic neuropathy	Edu 1	Edu2	Edu3
2			1	2	4	5	3	4	0	1	1	1	1	1	1	0	1	1	1	1	1	1	1	1	1	1	1	1	1	1	0	1	3	2	3	4	3	2	3	3	3	3	3	3	3	2	1
1			1	2	4	5	2	5	1	0	0	1	1	0	1	1	1	1	1	1	1	1	1	0	1	1	1	1	0	1	1	2	1	2	2	2	2	2	3	3	3	3	3	3	3	3	1
1	2000	0	1	2	4	1	3	4	1	1	0	1	1	1	1	1	0	1	1	1	1	1	1	1	1	0	1	1	1	1	1	1	2	3	2	3	2	2	3	3	3	1	4	3	2	3	1
2			1	2	5	3	3	3	1	1	0	1	1	1	1	1	0	1	1	1	1	1	0	0	1	1	1	1	0	1	1	2	2	2	2	2	2	2	2	2	3	3	3	2	2	2	1
1	200	1	1	2	5	3	1	1	1	1	0	1	0	0	0	1	0	1	1	1	1	1	1	1	1	1	1	1	1	1	1	1	3	3	4	4	2	1	3	3	3	1	4	2	2	2	1		1
1	200	1	1	2	5	2	2	1	1	1	0	1	0	0	0	1	0	1	1	0	1	1	1	1	1	1	1	1	1	1	1	1	2	2	2	2	2	2	3	3	3	3	4	2	2	2	1
1	30	0	1	2	4	2	3	2	1	1	1	1	0	0	0	1	0	1	0	0	1	1	1	0	1	0	1	1	0	1	1	3	5	5	3	3	3	2	3	3	4	2	4	3	2	2	1
1	200	1	1	2	5	5	4	2	1	1	0	1	0	0	0	1	0	1	1	0	1	1	1	1	1	1	1	1	1	1	1	1	2	3	3	4	3	3	2	4	4	2	3	2	2	3	1
2	20	0	1	2	4	5	3	1	1	1	1	1	1	0	0	1	0	1	1	0	1	1	1	1	1	1	1	1	1	1	1	1	1	3	4	4	2	1	1	2	3	2	4	3	3	3	1
2	60mg	0	1	1	4	4	3	2	1	1	1	1	1	0	0	1	0	1	1	1	1	1	1	1	1	1	1	1	1	1	1	1	2	2	3	3	2	2	4	4	4	1	4	2	2	2	1
1	30-200	0	1	2	4	5	3	4	1	0	1	0	1	0	1	0	0	1	1	1	1	1	0	0	1	1	1	1	0	1	1	1	2	3	3	3	2	4	3	3	5	3	3	3	3	3	1
1			1	2	4	5	2	2	1	1	0	1	0	0	0	1	0	1	1	0	1	0	1	1	1	0	1	1	1	1	1	2	1	2	2	3	3	2	3	1	1	3	3	1	2	3	1
1	200	1	1	2	5	5	2	4	1	1	0	1	1	1	0	1	0	0	1	1	1	1	1	0	1	1	1	1	1	1	1	1	2	3	3	4	4	4	5	4	3	2	3	3	3	3			1
1	200	1	1	2	5	5	3	4	1	1	0	1	1	0	0	1	0	1	1	1	1	1	1	0	1	1	1	1	1	1	0	1	2	3	2	2	1	2	3	3	2	3	3	3	2	3	1
2	200	1	1	2	4	4	4	3	1	0	1	0	1	1	0	1	1	1	1	0	1	1	1	0	1	1	1	1	1	1	1	1	1	3	3	3	2	2	2	3	2	2	3	2	2	2	1
1			1	2	4	1	4	1	1	1	0	1	0	0	0	1	0	0	1	0	0	1	1	0	1	0	1	1	0	1	1	2	5	5	4	4	4	3	3	4	2	2	4	3	3	3
2			1	2	5	5	1	5	1	1	0	1	1	1	0	0	1	1	1	1	1	1	1	0	1	1	1	1	0	1	1	1	1	1	3	3	2	2	4	1	3	3	4	3	3	3	1
2			1	2	5	5	3	3	1	1	1	1	1	0	0	1	0	1	1	1	1	1	1	0	1	1	1	1	1	1	0	1	2	2	4	2	2	2	2	2	1	3	4	3	3	3	1
2	60	0	1	2	5	2	3	4	1	1	0	1	0	0	0	1	0	1	1	0	1	1	1	0	1	1	1	1	0	1	1	1	1	1	3	3	3	3	4	2	2	2	3	2	3	3	1
1	30mg	0	1	2	5	5	2	4	1	1	1	1	1	1	0	1	0	1	1	0	1	1	1	0	1	1	1	1	1	1	1	2	2	2	4	4	4	3	4	4	3	2	3	3	3	3
1	200mg/day	1	1	1	5	5	3	5	1	1	0	1	1	1	0	1	0	1	1	1	1	1	0	1	1	1	1	1	1	1	0	2	2	1	2	2	2	1	2	3	2	2	3	3	2	3	1
1	200	1	1	2	5	5	2	3	1	1	0	1	0	0	0	1	0	1	1	0	1	1	1	1	1	1	1	1	0	1	1	1	4	4	4	4	3	2	2	2	3	2	3	1	3	3	1
2	200	1	1	1	4	5	3	4	1	0	1	0	0	0	0	0	0	1	1	1	1	1	0	1	1	1	1	1	0	1	1	1	4	4	3	4	4	2	3	3	2	3	3	2	2	2	1
2	don't know	0	1	2	4	5	2	3	1	1	0	1	1	0	0	1	0	1	1	0	1	1	1	1	1	1	1	1	1	1	1	1	2	2	3	3	3	3	3	4	2	3	3	3	3	3	1
2	200	1	1	1	5	5	3	3	1	1	0	1	0	1	0	1	0	1	1	1	1	1	1	1	1	1	1	1	0	1	1	2	2	2	3	3	3	3	3	4	3	4	2	3	3	3	1
1	200	1	1	2	4	5	4	2	1	1	1	1	1	1	0	1	0	1	1	0	1	1	1	1	1	1	1	1	1	1	1	2	2	2	3	3	3	2	2	2	3	3	3	3	3	3	1
1	200	1	1	2	4	1	4	2	1	1	0	1	0	0	0	1	0	1	1	0	1	1	1	1	1	1	1	1	1	1	1	2	3	1	1	3	4	1	4	4	3	2	3	2	3	3	1
2			1	2	4	5	2	4	1	1	0	0	0	1	0	0	1	1	1	1	1	0	1	0	1	1	1	1	0	1	1	2	4	3	3	3	3	4	2	3	2	2	2	3	3	2	1
2	80	0	1	2	5	1	3	5	1	1	0	1	1	0	0	1	0	1	1	1	1	1	1	1	1	0	1	1	0	0	1	1	1	1	4	4	4	3	3	3	3	2	4	1	1	1	1
1	200	1	1	1	5	5	4	2	1	1	0	1	0	0	0	1	0	1	1	1	0	0	1	1	0	0	1	1	0	1	1	2	3	3	3	3	3	3	3	3	5	3	4	3	3	3	1		1
2	60	0	1	2	4	5	4	2	1	1	1	1	0	1	0	1	0	1	1	0	1	1	0	1	1	1	1	1	1	1	0	1	3	3	3	3	2	3	4	5	4	3	3	3	3	3	1
2			1	2	5	5	3	2	1	1	0	1	0	0	0	1	0	1	1	1	1	1	1	1	1	0	1	1	1	1	1	3	4	4	2	3	2	3	3	4	3	3	2	3	3	3	1
2				1	5	5	4	4	1	1	1	1	1	1	0	1	0	1	1	0	1	1	1	1	1	1	1	1	1	0	1	1	1	1	4	4	4	4	3	3	2	2	4	2	2	2	1
2			1	1	4	5	1	4	1	1	0	0	0	1	1	1	0	1	1	1	1	1	1	1	1	1	1	1	1	1	1	2	2	2	3	4	4	3	3	3	2	2	2	3	3	3	1
1	200	1	1	2	5	2	2	4	1	1	0	1	1	0	0	1	0	1	1	0	1	1	0	1	1	0	1	1	0	0	1	4	4	4	3	3	3	4	5	5	2	2	2	3	3	3	1
1	90-180	0	1	1	4	5	4	4	0	1	0	1	0	0	0	0	1	1	1	0	1	1	0	1	1	1	1	1	0	1	0	1	1	1	1	1	1	1	2	3	2	3	3	2	2	2	1
2	30	0	1	2	5	2	3	1	1	1	0	1	0	1	0	1	0	0	1	0	1	1	0	1	1	0	1	1	0	1	1	2	3	3	2	3	2	2	3	2	2	2	2	3	3	3	1
2			1	1	5	2	3	2	1	1	0	1	1	0	0	1	0	1	1	1	1	1	1	0	1	1	1	1	0	1	1	1	1	1	3	2	2	1	3	2	2	2	3	3	3	3	1
2	200	1	1	2	4	2	4	5	1	1	1	1	0	0	0	1	0	1	1	1	1	1	1	1	1	1	1	1	1	1	1	4	4	4	2	2	3	2	2	2	2	2	2	3	3	3	1
1	200	1	1	2	5	5	3	5	1	1	1	1	1	1	0	1	0	1	1	1	1	1	1	1	1	1	1	1	0	1	1	1	2	2	2	3	2	3	3	2	2	3	4	3	3	3	1
2	200	1	1	2	4	2	3	5	0	0	0	1	0	0	0	1	0	1	1	1	1	1	0	0	1	1	0	1	0	1	1	2	2	1	2	3	2	2	3	3	3	2	3	3	2	3	1
2	200	1	1	1	5	5	3	2	1	1	0	1	0	0	0	1	0	1	1	1	1	1	0	1	1	1	1	1	1	1	1	1	2	1	2	2	2	2	3	3	3	2	3	3	3	3	1
1	200	1	1	2	5	5	3	2	1	1	1	1	0	0	0	1	0	1	1	1	1	1	1	1	1	0	1	1	0	1	1	1	2	3	2	3	2	2	3	3	3	3	4	3	3	3	1
2	15	0	1	2	4	5	2	5	1	1	0	1	0	0	0	0	1	1	1	0	1	1	0	0	1	1	0	1	1	0	1	2	2	2	2	2	2	2	3	4	3	3	4	3	3	3	1
1	30	0	1	1	4	5	3	5	0	0	1	1	0	1	0	1	0	1	1	1	1	1	0	0	1	1	1	1	1	1	0	1	1	3	2	2	2	2	2	2	5	2	2	3	3	3	1
1	200	1	1	2	4	5	2	4	1	1	1	1	0	0	0	1	0	1	1	0	1	1	1	1	1	1	1	1	1	1	1	1	1	1	3	3	3	3	3	3	4	2	3	3	3	3			1
1	100	0	1	2	4	5	2	2	1	1	0	1	0	1	0	0	1	1	1	1	1	0	0	1	1	1	1	1	0	1	1	1	3	2	2	2	2	3	2	2	4	4	4	3	3	3	1
1	200	1	1	2	5	1	3	2	1	1	0	1	0	0	1	1	0	1	1	0	1	1	1	1	1	1	1	1	1	1	1	2	3	3	2	2	2	3	3	4	3	2	3	3	3	3	1
1	200	1	1	2	4	1	2	4	0	1	1	1	0	1	0	1	0	1	1	1	1	1	0	0	1	1	0	1	1	0	1	2	4	2	4	4	4	3	3	4	2	2	2	3	3	3	1
2	200 mg/day	1	1	2	5	1	3	4	1	0	0	0	0	0	0	1	0	1	1	1	1	1	1	1	1	0	1	1	1	0	1	2	4	2	3	3	3	4	4	4	3	4	4	3	3	1			1
1	>200	0	1	2	4	5	3	1	1	1	0	1	0	1	0	1	1	1	1	0	1	1	1	1	1	1	0	1	1	1	0	1	2	2	3	3	3	3	4	4	4	3	3	3	3	3	1
2	100	0	1	2	5	5	2	4	1	1	1	0	0	0	0	1	0	1	1	0	1	0	0	0	1	1	0	1	0	1	1	2	2	2	2	2	2	2	2	2	4	4	4	2	2	2	1
1	200	1	1	2	5	5	2	1	1	1	1	1	0	0	0	1	0	1	1	0	1	0	0	1	1	1	1	1	0	1	1	1	1	1	2	3	2	2	3	4	3	3	2	2	2	2	1
1	60	0	1	1	4	3	3	2	1	1	0	1	0	0	0	0	1	1	1	0	1	1	1	1	0	1	1	1	0	1	1	1	3	1	2	3	2	2	3	4	3	2	2	3	3	3	1		1
2			1	2	4	1	4	2	1	1	0	1	0	0	0	1	0	1	1	1	1	1	1	1	1	1	1	0	1	1	1	1	3	3	3	3	3	3	3	4	2	2	3	3	3	3	1
1	200	1	1	2	5	5	3	3	1	1	1	1	0	1	0	0	0	1	1	0	1	1	0	1	1	1	1	1	0	1	1	1	1	1	2	4	3	3	3	4	3	3	3	3	3	3	1
2			1	2	5	5	3	2	1	1	0	1	0	1	0	1	0	1	1	0	1	0	1	0	1	1	1	1	0	1	0	1	3	3	3	4	4	2	4	4	4	3	2	3	3	3	1
2	20	0	1	2	4	5	3	2	1	1	0	1	0	0	0	1	1	1	1	1	1	1	1	1	0	1	1	1	1	1	1	2	3	4	2	2	3	1	2	4	3	3	4	3	3	2	1
1	200	1	1	1	5	5	3	2	1	1	0	1	0	0	0	1	0	1	1	0	1	1	0	0	1	0	1	1	0	1	0	1	1	3	3	3	3	3	2	3	3	2	4	2	3	3	1
2	200	1	1	2	4	1	4	1	1	1	0	1	0	0	0	1	0	1	1	0	1	1	1	1	1	1	1	1	1	1	1	2	2	2	3	3	3	2	2	4	2	2	5	3	3	3	1
2			1	2	5	5	4	3	1	1	0	0	0	1	0	1	1	1	1	0	1	1	0	0	1	1	1	1	1	1	1	1	1	1	3	4	2	2	3	4	3	3	3	3	3	3	1
2			1	2	4	1	4	4	1	0	0	1	0	0	0	1	0	1	1	1	1	1	0	1	1	1	1	1	0	1	1	1	1	1	3	3	3	2	2	2	5	3	3	3	3	3	1
2	100	0	1	1	5	3	2	4	1	0	1	1	0	0	0	1	1	1	1	1	1	1	0	1	1	1	0	1	0	1	1	3	3	3	3	3	3	3	3	4	5	3	4	2	2	2	1
1	400mg	0	1	1	4	5	4	3	1	1	0	0	0	0	0	0	1	1	1	0	1	1	0	0	1	1	1	1	0	1	0	2	2	2	4	4	4	2	2	3	5	3	3	3	3	3	1
2	60	0	1	2	5	5	2	4	1	0	0	1	0	0	0	1	1	1	1	1	1	1	1	1	0	1	0	1	0	1	0	2	3	3	3	3	3	2	2	3	4	3	3	3	3	3	1
1	200	1	1	1	4	1	4	3	1	0	0	1	0	0	0	1	0	1	1	1	1	1	0	0	1	1	1	1	0	1	1	2	4	4	2	3	3	3	5	4	3	2	2	3	2	3	1
1			1	1	4	1	3	2	0	1	0	1	0	0	0	1	0	1	1	1	0	1	1	0	0	0	1	1	1	1	1	4	4	4	3	3	3	1	3	3	2	2	2	3	3	3	1
1	200	1	1	2	5	1	3	2	1	1	1	1	0	0	1	1	0	1	1	0	1	1	1	0	1	0	0	0	0	1	1	1	2	3	3	3	3	3	3	4	2	2	2	3	3	3	1
1	200	1	1	2	4	2	4	4	1	0	1	1	0	0	0	1	1	1	1	1	1	1	0	1	1	1	1	1	1	0	1	1	3	2	2	3	2	2	2	2	2	2	2	3	3	3	1
1			2	2	5	2	2	2	1	1	0	1	0	0	0	1	0	1	1	1	1	1	1	1	1	1	1	0	1	0	1	2	2	2	2	2	3	3	3	3	3	3	3	3	3	3	1
1			1	2	5	4	3	4	1	1	1	1	1	0	0	0	0	1	1	0	0	1	1	0	1	1	1	1	1	1	1	2	2	2	3	3	3	2	2	2	3	3	3	3	3	3		1
2			1	1	4	2	4	3	1	0	0	1	0	0	0	1	1	1	1	0	0	0	0	0	1	0	1	1	0	0	1	1	1	1	2	2	2	2	2	2	2	2	2	3	2	1	1
1	200	1	1	2	5	1	4	5	1	1	0	1	0	0	0	1	0	1	1	1	1	0	1	1	1	1	1	1	1	1	1	1	2	2	4	3	3	3	4	3	4	2	3	3	2	3	1
1	200	1	1	2	5	1	3	5	1	0	0	1	0	1	0	1	0	1	1	0	1	1	1	0	1	0	1	1	1	0	1	2	3	3	2	2	3	3	3	4	3	3	4	3	3	3	1
1	200	1	1	2	4	2	3	5	1	0	1	1	0	0	0	1	0	1	1	0	1	1	1	0	0	1	1	1	1	1	1	2	2	4	3	2	2	4	4	4	2	3	3	3	2	2	1
2			1	2	4	5	3	3	1	1	1	1	0	0	0	1	1	1	1	0	1	0	0	1	1	0	1	1	0	0	1	2	4	4	3	4	2	2	2	3	4	2	3	3	3	2	1
2			1	1	5	2	3	3	1	1	0	1	0	0	1	1	0	1	1	1	1	1	1	1	1	0	1	0	0	1	1	2	2	3	3	3	3	2	3	3	4	2	3	3	2	3	1
1	200	1	1	2	4	1	3	5	1	0	0	1	0	0	0	1	0	1	1	1	1	1	0	0	1	0	1	1	0	1	1	3	4	5	3	3	3	3	4	2	3	2	3	2	2	2	1
1			1	1	5	3	4	4	1	1	1	1	0	0	1	1	0	1	1	1	1	1	1	1	1	0	1	1	1	1	1	1	4	4	3	4	2	2	4	3	3	2	3	2	1	3	1
1	200	1	1	1	5	5	3	5	1	1	0	0	0	0	1	1	0	1	1	0	1	1	0	1	1	1	1	0	0	1	1	1	1	2	2	3	3	4	4	4	3	3	4	3	3	3	1
1	200mg/day	1	1	1	5	5	3	4	1	1	0	0	0	0	0	1	0	1	1	0	1	1	0	1	1	1	1	1	0	1	0	2	2	3	4	3	3	2	3	3	2	3	3	3	3	2	1
2	5	0	1	2	4	1	4	1	1	1	0	1	0	0	0	1	1	1	1	1	1	1	1	0	1	0	1	1	1	1	1	2	2	2	2	2	2	3	2	4	4	4	4	3	3	3	1
2			1	1	5	2	3	5	1	0	0	0	0	0	0	1	0	1	1	1	0	1	0	1	1	1	1	1	0	1	1	2	2	3	3	3	3	2	2	2	3	2	3	2	2	2	1
1	60	0	1	2	5	5	3	2	1	1	1	1	0	0	0	1	0	1	1	0	1	1	1	1	1	0	1	1	1	1	1	1	2	3	4	4	3	3	4	3	2	3	3	1	3	3	1
2	80	0	1	1	5	5	4	4	1	1	1	0	0	0	0	1	0	1	1	1	1	1	1	1	0	1	1	1	1	1	1	2	2	3	3	4	4	3	3	5	3	3	4	3	2	3	1
1	any dose	0	1	2	4	4	4	1	1	1	1	1	0	0	0	1	1	1	1	0	1	1	0	0	1	1	1	1	1	1	0	1	2	2	3	2	3	3	3	3	2	2	3	3	2	3	1
1	?	0	1	2	4	5	3	1	1	1	1	1	0	0	0	1	0	1	1	1	1	1	1	0	1	1	1	1	1	1	1	1	2	1	2	4	2	2	4	4	3	4	2	3	3	3	1
1	60-180mg/d	0	1	2	4	5	4	5	1	1	0	1	0	0	0	1	0	1	1	0	1	1	0	0	1	1	1	1	0	1	1	1	1	1	4	4	3	3	3	4	3	3	3	3	3	3	1
2	60	0	1	1	4	5	2	1	1	1	0	1	0	0	0	1	1	1	1	1	1	0	1	0	1	1	1	1	0	1	1	2	3	3	3	4	3	2	3	3	3	2	2	2	2	2	1
2			1	2	4	5	3	5	1	1	0	1	0	0	0	1	1	1	1	0	1	1	0	0	1	1	1	1	0	0	1	1	2	3	2	3	3	2	3	2	3	2	3	1	2	2	1
1	200	1	1	2	4	3	4	3	1	1	0	0	1	1	1	1	1	1	1	0	1	1	0	0	1	1	1	1	1	1	1	1	1	1	2	2	2	2	3	3	4	3	3	3	3	3	1		1
2	30	0	1	1	4	1	3	2	1	1	0	1	0	0	0	1	0	1	0	0	1	1	1	0	1	0	1	1	0	0	1	3	4	3	3	3	4	3	3	2	4	2	3	1	1	2	1
2	100	0	1	1	4	2	3	5	1	0	0	1	0	0	0	1	0	1	1	0	1	1	0	0	1	1	1	1	1	1	1	1	3	2	3	3	3	2	2	3	2	2	3	3	2	2	1
1	200	1	1	2	4	2	3	1	1	0	0	1	0	0	0	1	1	1	1	0	1	1	1	0	1	1	1	1	0	1	1	1	3	3	2	2	2	1	1	1	2	2	3	3	3	3	1
1			1	2	4	2	4	5	1	0	1	1	0	0	0	1	0	1	1	0	1	1	0	1	1	1	1	1	0	0	1	1	1	1	2	2	1	2	3	4	2	4	3	3	2	3	1
1			1	2	5	2	3	2	1	0	1	1	0	0	0	0	0	1	1	1	1	1	1	0	1	0	1	0	1	1	1	3	2	2	3	3	3	4	4	4	3	2	3	3	3	3	1
2	60	0	1	2	4	5	3	2	0	1	1	1	1	1	0	1	1	1	1	1	0	1	1	0	0	1	1	1	0	0	1	2	2	2	2	2	2	3	2	3	3	3	3	3	3	3	1
2	10	0	1	2	5	5	3	3	1	1	1	1	0	1	1	1	0	1	1	0	1	1	1	1	1	1	1	1	1	1	0	1	1	1	4	4	2	4	4	3	4	2	3	2	2	3	1
1			1	2	5	5	3	4	0	1	0	1	0	0	0	1	0	1	1	0	1	1	1	1	1	1	1	1	1	1	1	2	2	2	3	3	3	3	3	3	4	3	3	3	3	2	1
2	200	1	1	2	5	5	4	3	1	1	0	1	0	0	0	1	0	1	1	0	1	0	1	1	1	1	1	1	1	1	1	1	3	3	3	3	4	3	4	4	4	3	4	1	1	2	1
2	n/a	0	1	2	4	2	3	4	1	0	0	1	0	0	0	1	0	1	1	1	1	1	1	0	1	1	1	1	0	0	1	1	1	5	3	3	2	3	3	4	4	3	3	2	2	3	1
2	30	0	1	1	4	3	3	5	0	1	0	0	1	0	0	1	1	1	1	0	1	1	0	0	1	1	1	1	1	0	0	2	3	4	2	2	3	2	2	3	4	4	4	2	2	2	1
2	200	1	1	2	4	2	4	5	1	0	0	0	0	1	0	1	1	1	1	0	1	1	0	1	1	1	1	1	1	0	1	2	2	2	3	3	2	2	2	2	2	2	2	2	2	2	1
1	200	1	2	2	4	2	1	2	1	1	1	0	1	0	0	1	0	1	1	1	1	1	0	0	1	1	1	1	0	0	1	3	4	3	2	3	3	1	3	3	2	2	2	3	3	3	1
2	30	0	1	2	5	2	3	2	1	0	0	0	0	0	0	1	0	1	1	0	1	1	1	1	1	0	1	0	1	1	1	2	3	4	4	4	3	2	3	4	3	2	3	3	3	3	1
2			1	2	5	5	2	1	1	1	0	1	1	0	0	1	0	1	1	1	1	0	1	1	1	1	1	1	1	1	1	1	3	3	3	3	3	3	5	4	2	3	3	1	3	3	1
2	200	1	1	2	5	3	4	4	1	1	0	1	0	0	1	1	0	1	1	0	1	1	0	1	1	1	0	1	1	1	1	1	1	1	3	3	3	3	3	3	2	2	2	3	3	3	1
1	200	1	1	1	5	5	4	4	1	1	0	1	0	1	1	1	0	1	1	1	1	1	1	1	1	1	1	1	0	1	1	2	2	2	3	3	3	3	4	4	3	2	3	3	3	2	1
2	60mg	0	1	1	4	5	3	4	1	1	1	1	1	0	0	0	0	1	1	0	1	1	0	0	1	1	1	1	1	0	1	2	3	4	3	2	2	2	3	4	2	3	2	3	3	3	1
1	200	1	1	2	4	5	3	1	1	1	0	0	0	0	0	0	1	1	1	0	1	1	1	1	0	1	1	1	0	1	1	1	3	4	3	3	3	2	3	4	2	2	3	3	2	3	1
1	200	1	1	2	5	3	3	2	1	1	1	1	0	1	0	1	0	1	1	1	1	1	1	1	1	0	1	0	0	1	1	1	1	1	3	3	3	3	4	4	1	2	4	2	1	2	1
1	200	1	1	2	5	5	3	1	1	1	1	1	0	1	0	1	0	1	1	1	1	0	1	1	1	1	1	1	1	1	1	1	3	1	3	3	4	4	4	4	4	3	5	3	2	3	1
1	200	1	1	1	4	4	3	4	1	1	1	0	1	0	0	1	1	1	1	0	1	1	1	1	1	1	1	1	1	1	1	3	5	3	3	3	3	2	4	3	4	3	3	3	3	3	1		1
2			1	2	5	2	2	4	1	1	0	0	1	0	0	1	0	1	1	1	1	1	1	1	1	1	1	1	0	1	1	2	2	2	3	3	3	2	2	2	4	3	3	3	3	2	1
2	30	0	1	1	4	5	3	4	1	1	0	0	1	0	1	0	1	1	1	1	1	1	0	1	1	0	1	1	0	1	1	2	2	1	2	2	2	2	1	1	4	2	3	3	3	3	1
2			1	1	5	5	2	4	1	1	1	0	0	1	0	1	0	1	1	1	1	1	0	1	1	1	0	1	0	1	0	1	1	1	3	3	3	1	1	1	4	2	5	3	3	2	1
2	6	0	1	2	5	4	2	5	1	1	0	0	1	1	0	1	0	1	1	1	1	1	1	1	1	1	1	1	0	1	0	2	3	3	2	2	3	2	2	3	3	2	3	2	3	3	1
1	200	1	1	2	5	5	3	1	1	0	0	1	0	0	0	1	0	1	1	0	1	0	1	1	1	1	1	1	1	1	1	2	3	3	3	3	3	4	4	4	5	2	2	3	3	3	1
1	200	1	1	1	5	5	2	5	1	1	1	0	1	0	0	1	0	1	1	0	1	0	1	1	1	1	0	1	0	1	1	1	3	4	2	3	4	4	2	2	2	2	4	3	2	2	1
1	200	1	1	2	4	3	2	4	0	1	1	1	1	0	0	1	1	1	1	0	1	1	1	0	1	0	1	1	1	1	1	1	3	3	3	3	3	2	3	4	4	3	3	3	2	3	1
2			1	1	5	5	3	4	0	1	0	1	1	1	0	1	0	1	1	1	1	1	0	1	1	1	1	1	0	1	1	1	1	1	2	2	2	3	3	3	1	2	2	3	3	3	1
2	300	0	1	2	4	5	3	4	1	0	1	1	0	0	1	1	1	1	1	0	1	1	0	0	1	0	1	1	0	1	1	2	3	3	3	3	3	2	3	3	4	2	2	2	3	3	1
2	??	0	1	1	5	5	4	2	0	1	0	1	0	0	0	1	0	1	1	0	1	0	1	1	1	1	1	1	0	1	0	1	2	1	3	4	3	1	1	1	5	3	3	2	2	3	1
1	More 100mg	0	1	2	5	2	3	2	1	1	0	0	0	0	0	1	0	1	1	1	1	1	0	1	1	1	1	1	0	1	1	1	1	1	3	1	3	3	5	4	4	2	2	2	3	2	1
2			1	2	4	5	4	5	1	1	0	1	1	1	0	1	1	0	1	0	1	1	0	1	1	0	0	1	1	1	0	2	4	4	3	3	3	2	2	2	4	3	3	1	1	1	1
2	120	0	1	1	5	5	3	1	0	1	1	0	0	0	0	1	0	1	1	0	1	1	1	1	1	1	0	1	0	1	0	1	2	1	2	3	2	3	3	2	4	3	2	3	3	2	1
1	200	1	1	2	4	4	3	1	1	1	0	1	0	1	0	1	0	1	1	1	1	1	1	0	1	0	0	1	0	1	1	1	2	2	3	4	3	1	2	1	2	3	4	3	3	2	1
2			1	2	4	3	4	3	1	1	1	1	1	0	0	1	0	1	1	1	1	1	1	1	0	1	0	1	1	1	1	3	4	5	3	5	3	2	3	4	4	2	2	3	2	3	1
1	200	1	1	2	4	5	3	1	1	0	1	1	1	0	0	0	0	1	1	1	1	0	0	1	1	0	0	1	0	1	1	2	2	2	3	3	2	4	3	2	2	3	3	3	2	3	1
1	200	1	1	2	5	5	3	1	1	1	1	1	0	1	0	1	0	1	1	0	1	1	0	1	1	1	1	1	0	1	1	1	1	1	3	4	3	4	4	4	4	4	4	1	3	3	1
2			1	2	4	4	3	3	1	1	0	0	1	0	0	1	1	1	1	0	1	1	0	1	1	0	0	1	0	1	1	2	4	3	4	4	4	2	2	4	3	3	2	3	3	3	1
2	200	1	1	1	4	5	4	5	1	1	0	0	1	0	0	1	0	1	1	0	1	1	1	0	1	0	0	1	0	0	1	2	3	3	2	2	2	3	3	3	4	3	2	3	3	3	1
1	30	0	1	1	5	5	4	2	1	1	1	0	1	1	0	1	0	1	1	0	1	1	1	1	1	1	1	1	0	1	1	1	1	1	3	3	2	4	4	4	4	3	3	3	3	3	1		1
2			1	2	4	1	4	5	0	0	0	1	1	1	0	1	0	1	1	0	1	1	1	0	1	0	0	1	0	0	1	1	2	3	4	3	3	4	4	5	2	4	4	1	2	3	1
2	180	0	1	1	4	5	3	2	1	1	1	1	0	0	0	1	1	1	1	1	1	0	1	1	1	0	0	1	0	1	1	1	3	2	3	3	2	2	3	1	2	2	3	3	3	3	1
2	30	0	1	2	5	4	3	4	1	1	1	0	1	0	0	1	0	1	1	1	0	1	0	1	1	1	1	1	0	1	1	1	1	3	2	2	2	2	2	2	3	3	3	3	3	2	1
1	200	1	1	2	4	1	3	4	1	0	0	1	0	0	0	1	0	1	0	1	1	1	1	0	1	0	0	1	0	0	1	1	3	2	2	3	3	3	3	2	4	2	3	3	3	2	1
2	15	0	1	2	4	5	2	4	1	1	0	0	1	0	0	1	1	1	1	0	1	0	0	0	1	1	1	1	0	0	0	1	2	1	3	3	3	3	3	3	4	3	3	3	3	3	1
2			1	1	5	5	3	1	1	0	1	1	1	0	0	1	0	1	1	1	1	1	0	1	1	1	1	1	1	1	1	1	3	3	3	3	3	3	3	3	4	3	3	3	3	3	1
1	200	1	1	2	4	1	3	3	0	1	0	1	0	0	0	0	1	1	1	1	1	1	1	1	1	1	1	1	1	1	1	1	3	1	4	4	4	3	4	4	3	1	2	2	2	2	1
1	200mg/day	1	1	2	4	2	3	1	1	1	0	1	0	0	0	1	0	1	1	1	1	1	0	0	1	1	1	1	0	1	1	1	3	2	2	2	3	2	3	2	2	1	3	3	2	2
1	30	0	2	1	4	4	3	5	1	1	1	1	1	0	0	0	1	1	1	0	1	1	0	0	0	0	1	1	0	1	1	2	2	2	3	3	3	2	3	2	3	3	3	3	3	2	1
2	?	0	1	2	4	2	4	2	1	1	0	0	1	1	0	0	0	1	1	1	1	1	1	1	0	1	1	1	1	1	0	2	4	3	3	3	3	4	4	4	2	2	3	2	2	2	1
2	60/day	0	1	1	5	5	3	5	1	1	1	1	0	1	0	1	0	1	1	0	1	1	1	0	0	0	1	1	0	1	0	1	1	1	2	2	2	3	4	3	4	3	3	3	3	3	1
1	80	0	1	2	4	5	3	4	1	1	1	1	1	0	0	0	0	1	1	0	1	1	1	1	1	1	1	1	0	1	1	2	3	4	2	2	3	3	2	3	3	3	4	3	3	2	1
2			1	2	4	5	3	3	1	1	0	0	0	0	0	0	0	1	1	1	1	0	0	1	1	0	1	1	0	1	0	2	1	1	1	1	2	2	2	2	2	2	3	3	3	3	1
1	50	0	1	1	5	3	3	5	1	1	1	0	1	0	0	1	0	1	1	1	1	0	0	1	1	1	1	0	0	0	0	3	3	2	3	3	3	3	3	4	1	3	1	3	3	2	1
2			1	2	5	5	4	1	0	1	0	0	0	0	0	1	0	1	1	1	1	1	0	1	1	0	1	1	1	1	1	1	1	1	3	3	3	3	3	4	2	2	2	3	3	3	1
1	200mg	1	1	1	5	1	4	4	1	0	0	0	0	0	1	1	0	1	1	0	1	1	1	1	1	1	1	1	0	1	1	2	3	3	2	2	2	3	4	4	5	3	3	1	2	3	1		1
1	200	1	1	2	5	3	3	2	1	1	0	1	0	0	0	0	0	1	1	1	0	1	0	1	1	1	1	1	1	1	1	1	1	1	2	2	2	4	4	4	5	3	3	1	2	2	1
1	200	1	1	1	4	5	3	2	1	1	0	0	0	0	0	1	0	1	1	0	1	1	0	0	1	0	1	1	0	1	1	3	4	3	3	3	3	3	2	3	5	3	3	3	3	2	1
2			1	2	4	5	3	4	1	1	0	0	0	0	0	0	1	1	1	0	1	0	1	0	1	1	1	1	1	1	0	3	3	3	4	4	3	3	3	4	4	3	4	3	3	3	1
2	15	0	1	1	4	2	3	5	1	0	1	1	0	0	0	1	0	1	1	1	1	1	0	0	0	1	1	1	1	1	1	2	2	2	2	2	2	3	3	3	3	3	2	3	3	2	1
2			1	2	4	3	4	2	1	1	0	1	1	0	1	1	1	1	1	1	1	1	0	1	1	0	1	1	0	1	0	4	4	4	1	3	3	1	1	2	1	1	1	1	2	1	1
1	200	1	1	2	5	5	4	2	0	1	1	0	0	0	0	1	0	1	1	1	0	1	0	1	1	1	1	1	1	1	0	1	3	2	2	3	2	1	2	2	2	3	2	3	3	2	1
2			1	2	4	5	3	3	1	1	0	0	1	1	0	0	1	1	1	0	1	1	0	1	1	1	1	1	0	1	1	1	2	3	3	3	3	3	2	2	3	4	4	3	3	3	1
1	200	1	1	1	5	5	3	4	1	1	1	0	1	1	0	1	0	1	1	1	1	1	0	1	0	1	1	0	0	0	1	1	1	2	3	3	2	3	3	3	5	3	3	2	3	3	1
1	60	0	1	2	4	1	2	4	1	1	0	0	0	1	0	1	0	1	0	0	1	1	0	0	1	1	1	1	1	0	1	2	2	3	4	4	4	3	3	3	4	3	3	3	3	3	1
1	200	1	1	2	4	1	4	3	1	0	0	0	0	0	0	1	1	1	1	0	1	1	1	0	1	1	0	1	1	1	1	1	1	1	3	3	3	2	3	4	1	2	2	3	3	3	1
1	200	1	1	2	5	5	3	5	0	1	1	0	0	0	0	1	0	1	1	0	1	1	1	1	1	1	1	1	0	1	1	2	2	2	3	3	3	3	3	4	4	3	3	3	2	2	1
1	200	1	1	1	4	1	3	2	1	1	1	0	0	0	0	1	0	1	1	0	1	1	1	0	1	1	1	1	1	1	1	1	1	1	1	1	1	1	1	1	1	1	1	2	2	2	1
2	dont know	0	1	1	4	4	3	4	1	1	0	1	0	0	0	1	0	1	1	0	1	1	1	0	0	1	1	1	1	1	1	1	3	2	4	4	3	3	3	3	1	3	2	2	3	3	1
1	60	0	1	1	5	2	3	5	1	0	1	1	0	0	0	1	0	1	1	0	0	1	1	0	1	1	1	1	0	1	1	3	4	3	4	4	3	2	3	3	2	4	3	3	2	3	1
2	30	0	1	2	5	2	2	2	1	1	1	1	0	1	0	1	0	1	1	1	1	1	1	1	1	0	1	1	1	1	1	3	3	3	3	3	3	3	3	3	3	3	3	2	2	2	1
1	10	0	1	2	5	5	3	4	1	1	1	0	0	1	0	1	0	1	1	0	1	1	1	0	1	1	1	1	1	1	1	1	1	2	2	2	2	3	3	3	3	2	4	2	3	2	1
2			1	2	4	4	3	4	0	1	0	1	1	1	0	1	1	1	1	1	1	1	0	0	1	1	1	1	0	1	1	2	3	3	3	3	3	2	3	3	4	2	2	3	3	2	1
2			1	2	5	3	3	3	1	1	0	0	1	0	0	0	0	1	1	0	1	0	1	1	1	0	1	1	0	0	1	1	2	4	3	4	4	2	4	3	4	2	4	3	3	3	1
1	200	1	1	2	5	3	3	4	1	1	1	1	0	0	0	0	0	1	1	0	1	1	1	1	1	1	1	1	0	1	0	1	2	3	4	4	4	3	3	3	2	2	3	3	3	2	1
2	10	0	1	2	5	5	2	2	1	0	1	0	0	0	0	1	0	1	1	0	1	1	0	0	0	0	1	0	1	1	0	1	2	2	4	4	3	4	4	4	3	3	3	3	3	3	1
1	60	0	1	2	5	2	3	4	1	0	1	1	0	0	1	1	0	1	1	0	1	1	0	1	1	0	1	0	1	1	1	1	1	1	3	3	3	4	4	4	2	2	3	2	2	2	1
2			1	2	5	2	3	2	1	1	0	1	0	0	0	1	0	1	1	1	1	1	0	1	1	1	1	0	1	1	1	2	2	3	3	3	3	1	1	1	4	3	3	3	3	3	1
2	40	0	1	1	4	3	1	4	1	1	1	1	1	0	0	1	1	1	1	1	1	1	1	0	1	1	1	1	0	0	1	1	2	2	3	3	3	3	3	2	2	3	3	3	3	2	1
2			1	2	5	5	3	4	1	1	1	1	1	1	0	0	0	1	1	0	1	1	0	1	1	1	1	0	0	0	1	1	2	3	3	3	3	3	3	3	5	2	3	3	3	3	1
2	18	0	1	2	5	5	3	2	1	1	1	1	0	0	0	1	0	1	1	0	1	1	0	1	1	1	1	1	1	1	1	2	3	4	2	2	2	2	2	2	4	3	4	2	3	3	1
2	90	0	1	2	4	5	3	2	1	1	0	0	1	1	0	1	0	1	1	0	1	0	0	0	0	0	1	1	0	1	1	1	1	4	1	4	1	3	5	5	3	4	2	2	3	3	1
1	30	0	1	1	5	3	4	1	1	1	0	1	0	0	0	1	0	1	1	0	1	1	1	1	1	1	1	1	0	1	1	1	2	2	2	3	3	3	3	4	2	2	2	3	3	3	1
1	200	1	1	2	5	5	3	3	1	1	1	1	0	1	0	1	0	1	1	0	1	1	1	1	1	1	1	1	0	0	1	1	1	1	2	3	3	3	3	4	3	2	3	3	3	3	1
1	200	1	1	2	5	5	2	1	1	1	0	0	0	1	0	1	0	1	1	0	1	1	1	1	1	1	1	1	0	1	0	1	1	3	4	4	4	3	4	4	4	2	4	1	3	3	1
1	200	1	1	2	4	5	4	3	1	1	1	1	1	1	0	1	0	1	1	1	1	1	1	0	0	1	1	1	0	1	1	2	2	2	3	3	2	3	4	4	3	3	3	2	2	1	1
2	200	1	1	2	5	5	3	5	1	1	0	0	0	1	0	1	0	1	1	0	1	1	0	1	1	1	1	1	1	0	1	1	1	1	2	3	2	3	4	3	1	2	1	3	3	3	1
2			2	1	5	4	4	5	1	1	1	1	0	1	0	1	0	1	1	1	1	0	0	1	1	1	1	0	1	1	1	2	2	2	3	3	2	3	3	2	3	3	3	1	2	1	1
2			1	1	5	1	3	2	0	1	0	0	0	1	0	1	0	1	1	0	1	1	0	0	1	1	0	1	1	1	1	2	3	4	4	4	2	1	4	4	2	2	3	2	2	2	1
2	10	0	1	1	4	5	3	4	1	1	1	1	1	1	0	1	0	1	1	1	1	1	1	1	1	0	1	1	1	1	1	1	2	1	3	3	2	3	4	2	4	2	4	3	3	3	1
1	25	0	2	2	5	5	3	5	1	1	1	0	0	0	0	1	0	1	1	1	1	1	0	1	1	1	1	1	1	1	1	1	1	2	3	4	3	3	4	3	5	3	3	3	3	3	1
1	200	1	1	2	5	4	2	3	1	1	1	1	1	1	0	0	0	1	1	1	1	1	0	1	1	1	1	1	1	1	1	1	3	2	3	3	3	4	2	4	4	2	3	3	2	3	1
1	200	1	1	2	5	5	3	3	1	1	1	1	0	1	0	1	0	1	1	0	1	0	1	0	1	0	1	0	0	1	1	2	3	3	2	1	2	2	2	2	2	2	3	2	2	2	1
2			1	1	5	2	3	5	1	1	0	0	0	1	0	1	0	1	1	0	1	1	0	0	1	1	1	1	0	0	1	1	3	2	3	3	3	3	3	3	3	3	3	3	3	3	1
1	200mg	1	1	1	4	1	4	1	1	0	0	0	0	1	1	1	0	0	1	1	1	1	1	0	0	0	1	1	0	1	1	2	2	2	3	4	4	2	2	2	2	2	2	2	2	2	1
1	10	0	1	1	4	5	4	4	1	0	0	1	1	1	0	1	0	1	1	0	1	1	1	0	1	1	1	1	1	1	1	2	2	2	3	1	2	3	2	3	3	4	5	3	2	3	1
2	200	1	1	2	4	5	3	4	1	0	0	1	0	1	1	1	0	1	1	0	1	1	0	0	1	1	1	1	1	1	1	4	4	5	2	2	1	2	2	3	2	3	3	3	3	1	1
2	N?A	0	2	2	4	5	2	1	1	1	0	0	0	1	0	1	0	1	1	1	1	1	0	0	1	1	1	1	0	1	0	1	1	1	4	4	4	1	3	3	3	3	3	3	3	3	1
2	?	0	1	2	4	5	2	2	1	1	1	1	0	1	0	1	0	1	1	0	1	1	0	0	1	1	1	1	0	1	1	2	2	3	2	2	5	1	3	4	3	2	3	3	3	3	1
1			1	2	5	5	2	4	1	1	0	0	0	1	0	1	0	1	1	0	1	1	0	0	1	1	1	1	0	1	0	2	3	3	2	5	5	2	2	4	4	3	2	3	3	1	1
2			1	2	5	3	4	5	1	1	1	1	0	1	0	1	0	1	1	0	1	0	0	0	1	0	1	1	0	1	1	2	3	3	4	3	3	3	4	4	4	3	4	3	3	2	1
1	200	1	1	2	5	5	3	3	1	1	0	0	0	1	0	1	0	1	1	0	1	1	0	0	1	1	1	1	0	1	1	1	2	1	1	2	1	3	3	3	4	2	4	3	3	2	1
2			1	2	4	5	2	4	1	1	0	0	0	0	1	0	0	1	1	1	1	1	1	1	1	1	1	1	0	0	1	1	2	2	3	3	3	2	3	3	4	4	3	3	2	2	1
2			1	2	5	5	1	4	1	1	1	0	0	1	0	0	0	1	1	0	1	0	1	0	1	1	1	1	1	1	0	2	3	2	3	3	2	3	3	4	4	3	4	3	3	3	1
1	30	0	1	2	5	2	3	3	1	1	0	0	0	1	0	1	0	1	1	1	1	1	0	0	1	0	1	1	1	1	1	3	4	4	2	3	4	2	2	4	4	3	4	3	3	2	1
2	200	1	1	1	5	5	3	2	1	1	1	0	0	0	0	1	0	1	1	1	1	1	0	1	1	0	1	0	0	0	1	1	4	4	4	5	5	1	3	3	4	3	4	2	2	2	1
2			1	2	4	5	3	3	1	1	0	0	1	1	1	1	0	1	1	0	1	0	0	0	1	1	1	1	1	1	1	1	2	2	3	2	2	2	3	3	3	4	4	3	3	3	1
1	200	1	1	2	5	5	3	3	1	1	1	1	0	1	0	1	0	1	1	1	1	1	0	0	0	1	1	1	0	1	1	1	2	3	2	3	2	2	3	4	4	3	3	2	2	2	1
2			1	1	4	5	3	1	1	0	1	1	0	0	0	1	0	1	1	0	1	0	0	1	0	1	1	1	0	1	1	1	2	1	3	3	2	1	1	1	3	3	3	3	3	3	1
2	30	0	1	1	4	3	4	5	1	1	1	0	1	1	0	1	0	1	0	0	1	0	0	0	1	0	1	1	0	0	1	1	3	3	2	3	3	3	3	3	3	2	3	3	2	3
1	200	1	2	2	4	4	3	4	0	0	0	1	0	1	0	0	0	1	1	0	1	1	1	0	1	1	1	1	0	1	1	2	3	1	2	4	3	3	3	4	2	2	3	3	2	2	1
2			1	2	4	4	3	2	1	1	0	1	0	1	0	1	0	1	1	1	1	1	0	0	1	0	1	1	1	0	1	2	3	3	3	3	3	3	3	5	3	3	3	2	2	2	1
1	200	1	2	2	5	3	3	2	1	1	0	0	0	0	0	1	0	1	1	1	1	1	0	1	1	0	1	1	1	1	1	1	2	2	3	2	2	2	4	2	2	2	3	3	3	2	1
2	60	0	1	1	5	5	3	3	1	1	1	0	1	0	0	1	0	1	1	1	1	1	1	1	1	0	1	1	1	1	1	1	3	2	2	3	2	3	4	4	2	3	2	3	3	3
1			1	2	5	1	2	3	1	0	1	1	1	0	0	1	0	1	1	1	1	1	1	1	1	1	1	1	1	1	1	1	1	1	2	4	2	2	4	4	3	2	3	2	3	2	1
1			1	2	4	2	3	4	0	1	0	0	0	0	0	1	0	1	1	1	1	1	0	0	1	0	1	1	1	1	1	3	4	2	2	2	3	2	3	4	5	1	3	3	3	3	1
2	100	0	1	2	5	5	1	2	1	0	0	0	0	0	0	1	0	1	1	0	1	1	1	0	1	1	1	1	1	1	1	2	2	3	3	3	3	4	3	4	5	3	3	3	3	3	1
1	200	1	1	2	5	3	3	2	1	0	1	1	0	1	0	1	0	1	1	1	1	1	1	1	1	1	1	0	1	1	0	1	1	1	3	3	3	2	2	3	5	3	4	3	3	3	1
2			1	2	5	3	3	4	1	1	0	1	1	1	0	1	0	1	1	1	1	1	0	1	1	0	1	1	0	0	1	2	2	3	2	2	3	4	5	4	2	2	3	3	3	2	1
1	200mg	1	1	2	5	5	3	3	1	1	1	0	0	1	0	1	0	1	1	0	1	1	1	1	1	1	0	1	1	1	0	3	3	4	3	3	2	3	3	4	3	3	4	3	3	2	1
2			1	1	4	3	3	2	1	1	1	1	0	1	0	1	0	1	1	0	1	1	1	0	1	0	1	1	1	1	0	1	3	2	4	4	3	4	3	3	2	2	3	3	2	2	1
1			1	2	5	1	3	2	1	1	1	1	0	1	0	1	0	1	1	0	1	0	1	0	1	1	1	1	1	0	1	3	4	4	3	4	4	3	4	4	2	3	3	3	3	3	1
1	60	0	1	2	4	5	3	5	1	0	0	0	0	1	0	1	0	1	1	0	1	1	1	0	1	1	1	1	0	0	0	2	2	2	3	3	2	3	3	4	5	3	3	3	3	3	1
2				1	5	2	3	4	1	1	1	1	0	1	0	1	0	1	1	0	1	1	0	1	1	1	1	1	0	1	1	1	2	2	2	2	3	2	3	3	5	2	3	1	2	3	1
2	10	0	1	2	5	5	4	4	0	0	1	0	0	1	0	1	1	1	0	0	1	1	0	1	1	1	1	1	1	1	1	1	1	1	3	3	3	4	4	4	5	3	3	3	3	3	1
1	200	1	1	2	4	2	3	5	1	1	0	1	0	0	0	1	0	1	1	0	1	1	1	1	1	1	1	1	1	1	1	3	4	4	3	3	3	3	3	4	4	2	4	3	3	3		1
1	200	1	1	2	4	5	3	2	1	1	0	1	0	1	0	1	0	1	1	0	1	1	1	1	1	1	1	1	0	1	0	2	3	4	3	4	4	3	4	4	2	3	4	3	3	2	1
2	30	0	1	1	5	3	3	4	1	1	1	1	0	1	0	1	0	1	1	1	1	1	0	0	1	1	1	1	0	1	1	1	1	1	3	3	3	3	5	4	3	3	3	2	2	2	1
2			1	2	4	5	3	4	0	0	1	1	1	1	0	1	0	0	1	0	1	1	1	1	1	0	1	1	0	0	1	2	3	3	3	3	3	2	2	3	3	3	3	3	3	2	1
2	5	0	1	2	4	3	3	4	1	1	1	0	0	1	0	1	0	1	1	1	1	0	1	0	1	1	1	1	1	1	0	1	4	3	3	3	4	1	2	4	3	3	2	2	2	2	1
1	200	1	1	1	5	2	4	5	1	1	1	1	1	1	0	1	0	1	1	0	1	1	1	0	1	0	1	1	1	1	1	2	2	3	2	2	3	3	3	5	1	2	2	3	3	2	1
1	200	1	1	1	5	5	3	4	1	1	0	0	0	1	0	1	0	1	1	1	1	1	0	1	1	0	1	1	0	1	1	5	5	5	4	4	3	5	5	2	3	3	5	1	2	3	1
1	120	0	1	2	5	2	3	5	1	1	1	1	0	1	0	1	0	1	1	1	1	1	1	1	1	1	1	1	1	1	1	2	2	4	3	3	3	3	3	2	1	1	3	3	3	3
1	200	1	1	2	5	1	3	4	1	1	0	0	0	1	0	1	0	1	1	0	1	1	1	0	1	1	1	0	0	1	1	2	3	2	4	4	3	3	4	4	2	3	2	3	3	2	1
1	200	1	1	2	5	4	3	1	1	1	1	1	0	1	0	1	0	1	1	0	1	0	1	0	1	0	1	1	1	1	1	3	4	4	2	3	3	1	2	3	4	3	3	2	2	2			1
2	30	0	1	2	4	3	3	2	1	1	1	1	0	1	0	1	0	0	1	1	1	1	0	1	1	0	1	1	1	1	1	3	3	3	4	4	4	2	3	3	4	2	2	2	2	2	1
1	200	1	1	2	5	5	3	5	1	1	1	1	0	1	0	1	1	1	1	0	1	1	0	1	1	0	1	1	0	1	1	2	3	3	3	2	2	2	2	2	4	4	4	3	3	3	1
2	n/a	0	1	2	4	1	4	5	1	1	0	0	0	0	0	1	0	1	1	1	1	1	0	1	1	1	1	1	1	1	1	1	3	3	2	3	1	1	3	3	3	2	2	3	3	3	1
1	200mg/day	1	1	2	4	5	2	4	1	0	0	1	0	0	0	1	0	1	1	1	1	1	0	1	1	1	1	0	1	0	1	1	2	3	2	3	3	3	4	4	3	3	3	3	3	2	1
2			1	2	5	5	3	1	1	1	1	0	0	1	0	1	0	1	1	1	1	1	0	0	1	1	1	1	0	1	1	2	3	3	4	4	2	3	3	3	3	3	4	2	2	2	1
2			1	2	5	5	4	4	1	1	0	0	0	1	0	0	0	1	1	1	1	1	1	1	1	0	1	1	1	0	1	1	2	1	1	1	1	1	2	2	2	2	2	3	3	3	1
1	80mgéday	0	1	2	4	3	4	3	1	1	1	1	1	0	0	1	0	1	1	0	1	1	1	0	1	1	1	1	1	1	1	2	2	2	4	4	4	3	3	2	3	3	3	3	2	3
1	200	1	1	2	4	1	4	4	1	1	0	0	1	1	0	1	0	1	1	0	1	1	1	0	1	1	1	1	0	1	0	2	3	4	2	2	3	3	3	3	2	2	3	3	3	3	1
2			1	2	4	3	4	3	1	0	0	1	0	0	0	0	0	1	1	0	1	0	1	1	1	1	1	1	1	1	1	1	2	3	2	3	3	1	2	3	2	3	3	3	3	3	1
2			1	2	5	3	4	2	1	1	0	0	0	1	0	1	0	1	1	0	1	1	0	1	0	1	1	1	0	1	1	2	2	2	3	3	3	3	3	3	2	2	3	3	3	3	1
1	200	1	1	2	4	2	3	4	1	1	0	0	0	1	0	1	0	1	1	0	1	0	0	0	1	1	1	1	0	1	1	1	2	3	3	2	1	1	2	3	3	2	4	3	3	3	1
2	120	0	2	2	5	4	3	2	1	1	1	1	1	0	1	1	0	1	1	1	1	1	0	1	1	1	1	1	0	1	1	2	3	3	2	2	2	3	3	3	5	3	3	2	2	2	1
2	200	1	1	2	4	4	3	2	1	1	1	0	0	0	0	1	0	1	1	0	1	1	0	1	1	0	1	1	0	1	0	2	2	3	2	2	2	1	3	2	2	3	2	2	2	3	1
2			1	2	4	5	3	4	1	0	1	1	1	1	0	1	0	1	1	1	1	1	0	0	0	1	1	0	1	1	1	1	3	2	3	3	3	2	4	2	2	2	3	3	3	3	1
1	200mg/day	1	1	2	4	4	3	3	1	1	1	1	1	0	0	1	0	1	1	1	1	1	1	0	1	1	1	1	0	1	0	2	2	2	4	4	4	4	4	4	3	2	2	3	3	3	1
1	200	1	1	1	4	3	3	4	1	1	1	0	0	1	0	1	0	1	1	0	1	0	0	0	1	1	1	0	0	1	1	2	3	3	3	3	3	3	4	4	2	2	2	3	3	3	1
2	30	0	1	1	4	5	3	4	1	1	0	0	1	0	0	1	0	1	1	1	1	1	1	1	1	1	1	1	1	0	1	1	2	2	1	1	1	1	3	4	3	4	3	3	3	3	1
2			1	2	5	3	3	3	1	1	0	0	1	0	0	1	1	1	1	1	1	1	1	1	1	0	1	1	0	1	1	3	4	4	2	2	2	2	2	2	2	2	2	3	3	2	1
1	200	1	1	2	5	5	4	4	1	1	1	0	1	0	0	1	1	1	1	1	1	1	0	0	1	1	0	1	0	0	1	3	3	3	3	4	4	2	4	3	3	3	3	3	3	3	1
1	200 mg/day	1	1	2	5	3	3	4	1	0	0	1	0	0	0	1	1	1	1	1	1	1	1	0	1	1	1	0	0	1	1	1	3	2	3	3	3	2	3	2	3	3	3	3	3	3	1
1	200	1	1	2	5	4	3	3	1	1	0	0	0	0	0	1	0	1	1	0	1	1	1	0	1	1	1	1	0	1	0	1	1	1	2	2	2	2	2	3	2	2	3	3	3	3	1
1	200	1	1	2	4	5	3	5	1	1	1	0	1	1	0	1	0	1	1	0	1	1	0	0	1	0	1	1	0	0	0	1	1	1	3	4	2	2	2	3	2	3	2	3	3	3	1
2	60	0	1	2	4	2	3	4	1	1	0	0	1	1	0	1	0	1	1	0	1	1	0	0	1	1	1	1	0	1	1	2	3	2	2	3	3	1	2	3	4	4	5	1	2	3	1
2			1	2	4	3	4	1	1	1	1	1	0	1	0	1	0	1	1	1	1	1	0	1	1	0	1	1	0	1	1	2	2	1	3	3	3	2	3	2	2	2	2	3	3	3	1
1	200	1	1	1	4	5	3	5	1	1	0	0	1	0	0	0	0	1	1	0	1	1	0	0	1	0	1	1	0	1	0	2	4	3	2	3	3	2	3	3	4	4	4	2	2	2	1
2	60	0	1	2	5	4	3	3	1	1	0	0	0	0	0	1	0	1	1	1	1	1	1	0	1	1	1	1	0	0	1	3	4	2	3	3	3	2	3	2	4	3	4	2	3	2	1
2			1	2	4	2	4	2	1	1	0	0	1	0	0	1	0	1	1	0	1	0	1	0	1	0	1	1	1	1	1	3	3	4	3	4	3	2	3	2	4	3	3	3	3	3		1
1	30	0	1	2	5	1	3	5	1	1	0	1	0	0	0	1	1	1	1	0	1	1	1	0	1	1	1	1	1	0	0	2	2	4	3	3	3	3	3	4	4	2	2	3	3	3	1
2	200	1	1	2	5	5	3	3	1	0	1	0	0	0	0	1	1	1	1	0	1	1	1	0	1	0	1	1	0	1	1	2	3	3	3	2	2	2	3	4	5	3	4	3	3	3	1
1	180	0	1	1	5	5	2	1	1	0	1	1	0	0	0	1	1	1	1	0	1	1	1	1	1	0	1	1	1	1	1	1	1	1	3	3	2	3	4	3	1	1	3	3	3	2	1
2	300	0	1	2	5	5	4	4	1	0	0	0	1	0	0	1	1	1	1	0	1	1	0	0	1	0	1	0	1	1	1	1	2	3	3	3	3	2	4	3	2	3	2	3	3	3	1
1	10	0	1	2	4	1	3	4	1	0	0	0	0	0	0	1	0	1	1	0	1	0	0	1	1	0	1	1	1	1	1	4	4	4	3	3	3	2	3	4	2	2	2	3	3	2	1
1			1	1	4	5	4	5	1	1	1	0	1	0	0	0	0	1	1	0	1	1	1	0	1	0	1	1	0	1	1	2	2	2	4	4	4	3	3	3	3	3	3	3	3	3	1
1			1	1	5	5	3	2	1	1	1	1	1	0	0	1	1	1	1	0	1	1	1	1	1	0	1	0	1	1	1	2	4	2	4	4	4	5	5	5	2	2	2	3	3	3	1
1	200	1	1	2	4	1	4	2	1	0	0	1	1	0	0	1	0	0	1	0	1	1	0	0	1	1	1	1	0	1	1	2	4	2	3	3	3	4	4	4	3	3	3	2	3	3	1
1	200mg/day	1	1	1	5	5	3	4	0	1	0	0	0	0	0	1	1	1	1	0	1	1	1	0	0	1	1	0	1	1	1	2	2	3	3	2	2	2	4	4	3	2	3	3	3	3	1
1	200	1	1	2	4	5	4	4	1	1	0	0	0	0	0	1	0	1	1	0	1	1	1	1	1	1	0	1	1	1	1	1	2	2	3	2	3	2	2	2	2	2	3	3	3	2	1
1	200	1	1	2	5	5	3	1	1	1	0	1	0	0	0	1	1	1	1	0	1	1	1	0	1	1	1	0	1	1	1	2	3	3	3	3	3	2	3	3	5	3	3	2	2	2	1
2	30	0	1	2	5	2	3	3	1	1	0	1	1	0	0	1	1	1	1	0	1	1	0	1	1	0	1	0	1	1	1	2	4	4	2	2	2	3	3	2	2	2	3	2	2	2	1
1	200	1	2	2	4	5	2	5	1	0	1	1	0	0	0	0	0	1	1	0	1	1	1	1	1	0	1	1	0	1	1	1	1	1	2	3	2	3	3	2	3	3	4	3	2	3	1
1	200	1	1	2	4	5	1	2	1	1	1	1	1	0	0	1	0	1	1	1	1	1	0	1	1	0	1	1	1	1	1	2	2	3	3	2	3	3	4	3	3	3	4	3	3	3	1
2	10	0	1	2	5	5	3	2	1	0	1	1	1	0	0	1	1	1	1	0	1	1	0	1	1	1	1	1	1	1	0	1	1	1	3	3	3	4	4	3	3	3	3	3	3	3	1
1	200	1	1	2	4	5	2	1	1	1	0	1	1	0	0	1	0	1	1	1	1	1	1	0	1	1	1	1	0	1	1	1	3	4	4	4	4	3	3	3	4	3	5	3	3	3	1
2			1	1	4	1	2	3	1	1	0	0	1	0	0	1	0	1	1	1	0	0	1	1	1	1	1	1	1	1	1	1	2	2	3	3	3	2	3	3	5	3	3	2	2	2	1
1	200	1	1	2	5	5	3	1	1	1	1	1	0	0	0	1	1	1	1	1	1	0	1	0	1	0	1	1	0	1	0	3	3	3	4	4	3	3	3	2	2	3	4	2	2	3	1
2	200	1	1	1	4	3	3	5	1	1	0	0	0	1	0	1	1	1	1	0	1	1	0	1	1	0	1	1	1	1	1	2	3	3	3	3	2	3	4	4	3	2	3	2	1	3	1
2	15	0	1	2	4	2	3	4	1	1	0	0	0	1	0	1	0	1	1	1	1	1	1	0	1	0	1	1	0	0	0	1	1	1	1	2	1	2	4	4	3	2	4	3	3	3	1
1			1	2	5	5	2	4	1	1	0	1	0	0	0	1	1	1	1	0	1	0	1	1	1	0	1	1	1	0	0	1	2	3	3	3	3	3	3	3	3	3	3	3	3	3	1
2			1	2	5	5	2	1	1	0	0	1	0	0	0	1	0	1	1	0	1	1	1	0	1	0	1	1	0	1	1	1	5	4	3	3	2	2	3	2	2	3	2	3	3	3	1
2			1	2	5	4	3	5	1	0	0	0	1	0	0	1	1	1	1	0	1	1	0	0	1	0	1	1	1	0	1	1	2	2	3	3	3	3	3	3	5	3	4	3	2	2	1
2	100	0	1	1	4	1	3	5	1	1	1	0	0	1	0	0	0	0	1	0	1	1	1	1	1	1	1	1	1	1	1	3	5	5	3	1	2	2	4	3	5	2	2	3	3	3	1
2			1	2	5	1	3	5	1	1	1	1	0	0	0	0	1	0	1	1	1	0	0	0	0	0	1	0	0	1	0	2	2	2	4	4	4	3	4	4	4	2	3	3	3	3	1		1
2	100	0	1	2	4	5	2	2	1	1	1	1	0	0	0	1	0	1	1	0	1	1	1	1	1	1	1	1	1	0	0	2	2	2	1	1	1	2	2	2	5	3	3	2	2	2	1
2			1	2	5	3	4	4	1	1	0	1	1	0	0	1	1	1	1	0	1	0	1	0	1	1	1	1	1	1	1	1	4	4	2	4	2	2	4	3	4	3	3	1	2	3	1
2	na	0	1	2	5	3	3	2	1	0	1	1	1	0	0	1	0	1	1	0	1	1	1	1	1	1	1	1	1	1	1	3	3	5	3	3	3	3	3	3	3	3	3	2	2	2	1
2	200	1	1	2	4	1	4	5	1	1	0	1	0	0	0	1	0	1	1	1	1	1	0	1	1	1	1	0	1	1	1	2	2	2	3	3	3	3	3	2	5	3	3	3	3	2	1
1	100	0	1	2	5	3	2	2	1	0	1	0	0	0	0	1	0	1	1	1	1	1	1	1	1	0	1	1	1	1	1	1	1	1	2	1	1	4	3	3	5	3	3	1	2	1	1
1	200	1	1	2	4	5	3	2	0	0	1	1	0	1	1	1	0	1	1	0	1	0	0	1	1	0	1	1	0	0	1	1	3	3	2	3	3	3	3	3	5	4	3	3	2	2	1
1	60	0	1	2	4	5	3	5	1	1	1	0	0	1	1	1	0	1	1	0	1	1	0	0	1	1	1	0	1	1	1	3	4	4	3	4	3	2	3	1	5	2	2	2	2	3	1
2			1	2	4	3	4	3	1	1	0	1	0	1	1	1	0	1	1	1	1	1	0	1	1	0	1	1	0	1	1	2	2	3	2	2	2	3	3	3	5	2	3	3	3	3	1
1			2	1	4	5	4	5	1	1	0	1	0	1	0	1	0	1	1	1	1	1	0	1	1	1	1	1	0	0	0	3	3	3	4	4	4	3	3	3	5	3	3	2	2	2			1
1	200	1	1	2	5	1	3	4	1	0	0	0	1	0	0	0	1	1	1	0	1	1	0	0	1	1	1	0	0	0	1	1	2	2	3	3	2	1	2	4	3	2	2	2	2	3	1
1	200	1	1	2	5	5	3	5	1	0	1	0	0	0	0	1	1	1	1	0	1	0	1	0	1	1	0	1	1	0	0	1	1	1	2	3	3	2	3	4	2	2	2	3	3	3	1
1	200	1	1	1	5	2	3	3	0	1	0	0	0	1	0	1	1	1	1	0	1	1	0	0	1	1	1	1	1	1	1	1	1	1	2	2	2	2	3	3	5	3	3	1	1	1	1
2	60	0	1	2	5	5	4	1	0	1	0	1	1	1	0	1	0	1	1	0	1	1	1	0	1	0	1	1	0	1	1	1	1	1	3	4	3	3	3	3	5	3	3	3	3	3	1
1	30	0	1	1	4	5	3	4	1	1	0	1	0	1	0	1	0	1	1	1	1	1	1	1	1	1	1	1	1	1	0	1	3	3	3	4	3	2	4	4	5	3	4	3	3	3	1		1
2	200	1	1	2	5	1	1	4	1	1	1	0	0	1	0	0	1	1	1	0	1	1	0	0	1	0	1	0	0	1	1	3	3	3	2	2	2	4	4	3	5	3	3	2	2	2	1
2			1	1	4	4	4	4	1	1	1	0	0	1	0	1	0	1	1	1	1	1	0	1	1	0	0	1	0	1	1	2	3	4	3	4	3	3	3	3	5	3	4	2	2	2	1
2	؟		1	1	4	5	3	4	1	1	1	1	1	0	0	1	1	1	1	0	1	1	1	0	1	1	1	1	0	0	1	1	1	2	3	3	3	3	3	4	2	3	2	3	3	2	1
1	200	1	1	2	5	5	1	2	1	0	0	1	1	0	0	1	1	1	1	0	1	0	0	0	1	0	1	1	0	1	1	1	2	1	4	4	3	3	3	3	3	4	2	3	2	2	1
2	30	0	1	2	5	4	4	3	1	1	1	0	1	0	0	1	1	1	1	0	1	1	1	0	1	0	1	1	1	1	1	1	3	3	2	2	4	2	2	2	4	3	3	2	2	2	1
2			1	1	4	5	3	3	1	1	0	1	0	0	0	1	0	1	1	0	1	1	0	0	1	0	1	1	0	1	1	2	3	3	3	3	2	3	4	4	4	3	3	2	2	2	1
1	100	0	1	2	5	5	3	5	1	0	0	1	1	0	0	1	1	1	1	0	1	1	1	0	1	1	1	1	1	1	1	2	2	1	2	3	2	3	3	2	4	2	3	3	3	3	1
2	?	0	1	1	4	1	4	3	1	1	1	1	1	1	0	0	0	0	1	1	1	1	0	1	1	0	1	0	0	1	1	2	3	5	3	3	3	3	3	3	4	2	3	3	3	2	1
2	15	0	1	2	5	5	3	4	1	1	0	1	0	0	1	1	1	0	1	0	1	1	1	1	1	1	1	1	1	1	1	2	2	2	2	3	3	2	3	3	4	2	3	2	2	2
2	60	0	2	1	4	3	1	4	1	1	1	1	1	0	0	1	0	1	1	0	1	1	0	1	1	1	1	1	0	1	1	1	4	4	3	3	3	3	5	5	4	3	3	3	3	3	1
1	200	1	1	2	5	2	3	2	0	0	0	1	0	0	0	1	1	1	1	1	0	1	0	1	1	0	1	1	0	0	1	2	2	2	2	3	3	3	4	4	3	3	3	2	1	1	1
1	200	1	1	2	4	5	3	4	1	1	1	0	0	1	0	0	0	1	1	1	1	1	1	0	1	1	1	1	0	1	0	1	3	3	2	2	1	1	3	3	3	3	2	3	3	3	1
1	200	1	1	1	4	5	4	4	1	1	1	1	0	1	0	1	0	1	1	0	1	1	1	1	1	1	1	1	1	1	1	1	2	3	3	4	3	3	3	2	5	4	4	3	3	2	1
2	200	1	1	2	5	5	3	4	1	1	1	1	0	0	0	1	1	1	1	1	1	1	0	1	1	0	1	1	1	1	1	2	4	4	3	3	2	3	4	4	5	2	3	3	1	1
1	200	1	1	2	4	5	2	3	1	1	1	0	0	0	0	1	0	1	1	1	1	0	1	1	1	1	1	1	0	1	0	1	2	1	3	2	2	3	3	2	5	4	4	3	2	2	1
2			1	2	4	3	3	4	1	1	1	0	0	1	0	1	0	1	1	0	1	1	0	0	0	1	1	0	0	1	1	1	3	2	3	3	3	2	2	1	2	2	2	2	2	2		1
1			1	2	4	4	1	5	1	1	0	0	0	0	0	1	0	1	1	0	1	1	0	0	0	0	1	0	0	0	0	1	3	4	3	3	3	3	3	3	2	3	4	1	3	3
2	100	0	1	1	5	3	3	3	1	1	1	0	1	0	0	1	1	1	1	1	1	0	0	0	1	0	1	1	1	0	0	2	3	3	3	3	3	3	4	3	4	3	4	1	2	2	1
2	200	1	1	2	4	5	3	2	1	1	1	0	0	1	0	1	0	1	1	0	1	1	0	0	1	0	1	0	0	0	1	2	2	2	3	3	3	4	4	4	3	3	3	3	2	3	1
2			2	1	5	3	3	4	1	1	1	0	0	0	0	1	1	1	1	0	1	1	1	1	1	0	1	1	1	1	1	1	2	3	3	3	3	3	3	3	2	3	2	3	3	3	1
2			1	1	4	5	3	5	1	1	1	0	1	0	0	1	1	0	1	0	1	1	1	1	1	1	1	1	0	0	1	2	3	3	3	3	3	2	3	1	2	2	2	3	3	3
1	200	1	1	2	4	2	3	3	0	0	1	1	1	0	0	1	0	1	1	1	1	1	1	1	1	0	0	0	1	1	0	3	3	3	3	3	3	4	4	4	5	2	2	2	2	2	1
1			1	2	4	5	3	2	1	1	0	0	0	0	0	1	0	1	1	0	1	1	0	0	1	1	1	1	0	1	1	1	2	3	3	3	2	2	3	3	5	4	3	3	3	3	1
2	50	0	1	2	4	2	3	2	1	0	1	0	0	1	0	1	1	1	1	0	1	1	0	1	1	0	1	1	0	0	0	3	3	3	3	3	3	3	3	3	5	3	3	2	2	2	1
2			1	2	4	5	2	5	1	1	0	1	0	0	0	1	1	1	1	1	1	1	1	0	1	1	1	1	1	1	0	1	1	2	3	4	3	4	4	4	5	3	3	2	2	2	1
2	50	0	1	1	5	3	3	5	0	0	0	0	0	0	0	1	1	1	1	0	1	0	0	0	0	1	1	1	0	0	0	3	4	4	1	1	2	3	3	3	3	2	3	2	2	2	1
2			1	2	5	1	3	1	0	0	0	0	0	0	0	0	1	0	1	0	0	0	0	0	0	0	0	1	0	0	0	1	2	1	3	2	2	3	3	3	3	3	3	3	3	2	1
2	n/a	0	1	2	5	5	1	5	1	1	0	1	0	0	0	1	0	1	1	0	1	1	1	1	1	1	1	1	0	1	0	1	1	4	4	4	4	3	4	3	2	2	3	2	1	3	1
1	200	1	1	1	4	5	3	1	1	1	0	0	1	1	0	1	0	1	1	0	1	1	0	0	1	0	1	1	1	0	0	1	3	4	3	4	3	3	3	3	5	2	3	3	3	2
1	100	0	1	1	4	5	3	2	1	1	0	0	0	1	0	1	0	1	1	1	0	1	0	0	1	0	1	1	1	1	1	3	4	5	3	4	4	4	4	4	5	4	3	3	3	3	1
2			1	2	5	3	2	3	0	1	0	0	0	0	0	1	0	1	1	1	1	1	1	1	1	0	1	1	0	1	1	2	3	3	2	3	2	3	3	3	5	2	3	3	3	2	1
1	20	0	1	2	4	5	3	3	1	1	1	1	1	1	0	1	0	1	1	0	1	1	1	0	1	1	1	0	1	1	1	2	3	3	3	3	3	1	2	2	3	2	2	3	3	3	1		1
1	200	1	1	2	4	3	3	3	1	1	0	0	1	0	0	1	0	1	1	0	1	0	0	0	1	0	0	0	1	0	0	1	2	1	3	2	3	3	3	3	3	2	3	3	3	3	1
2	20	0	1	2	5	2	2	5	1	1	0	0	1	0	0	1	0	1	1	0	1	1	1	1	1	0	1	0	0	1	1	2	5	4	2	3	2	5	3	5	5	4	3	2	3	3	1
2			1	2	5	5	3	3	1	1	1	0	0	0	0	1	1	1	1	0	0	1	0	0	1	1	1	1	0	0	1	1	2	2	3	4	3	2	4	4	5	2	3	3	3	3	1
2			2	1	5	5	2	2	1	1	1	0	0	0	0	1	1	1	1	1	1	1	0	0	1	1	0	1	0	1	1	2	3	3	3	4	3	2	4	4	5	2	3	2	3	2	1
1	200	1	1	2	5	5	2	1	0	1	0	1	0	0	0	1	1	1	1	0	1	1	1	0	0	0	0	1	1	1	1	1	1	1	4	4	4	5	5	3	4	4	4	1	1	2	1
1	200	1	1	2	4	3	4	3	1	1	0	1	1	0	0	1	1	1	1	1	1	1	0	1	1	0	1	1	1	0	1	1	3	3	4	4	3	3	3	4	3	1	3	2	3	3	1
2			1	1	5	5	3	2	1	1	1	1	0	0	0	1	1	1	1	1	1	1	1	1	1	1	1	1	1	1	1	1	3	3	3	3	3	2	2	2	3	3	3	3	3	3	1
1	200	1	1	2	5	5	4	2	1	1	0	1	0	1	0	1	0	1	1	1	0	1	1	1	1	1	1	1	0	0	1	2	2	3	3	3	3	3	3	3	3	3	4	3	3	3	1
2			1	2	5	2	3	3	0	1	1	1	1	0	0	1	1	1	1	0	1	1	0	1	1	0	1	1	0	1	0	1	3	4	2	3	3	1	3	4	3	4	4	3	3	3	1
2	60	0	1	2	4	3	3	2	1	1	1	0	1	1	0	1	0	1	1	0	1	1	1	0	1	1	1	0	1	1	1	1	3	3	2	3	3	1	2	4	3	2	3	3	3	3	1
2			1	2	4	5	3	3	1	1	1	1	1	0	0	1	1	1	1	1	0	1	1	1	1	1	1	1	1	1	0	1	1	1	2	3	2	1	2	2	4	4	4	2	2	2	1
1	200	1	1	2	5	3	3	3	0	1	0	0	1	0	0	1	1	1	1	0	1	1	0	1	1	1	1	1	0	1	1	1	2	2	3	3	3	2	2	2	3	3	4	3	2	2	1
2	60	0	1	2	5	1	4	4	0	1	0	1	1	0	0	1	1	1	1	1	1	1	1	1	1	1	1	1	1	1	1	1	3	1	3	3	3	2	3	3	4	4	5	3	3	1	1
2			1	2	4	5	3	5	1	1	1	0	1	0	0	1	0	1	1	1	1	1	1	1	1	1	1	1	1	1	0	1	2	2	3	3	3	3	3	3	3	2	3	3	3	2	1
2			1	2	4	3	3	5	1	1	0	0	1	0	0	1	1	1	1	0	1	1	1	1	1	1	1	1	1	1	0	2	2	2	3	3	3	2	2	2	3	2	3	3	3	3	1
1	60	0	1	2	4	5	2	5	0	1	1	1	0	0	0	1	0	1	1	0	1	1	0	0	1	1	1	1	0	1	0	2	2	2	2	2	2	3	4	3	2	2	5	3	3	3	1
1	200	1	1	2	5	1	3	3	1	1	0	0	0	0	0	1	0	1	1	1	1	1	0	1	1	0	1	1	0	1	1	1	1	1	2	3	2	2	4	3	3	3	4	3	3	3	1
2	40	0	1	2	5	5	3	2	1	1	1	0	1	1	0	1	1	1	1	1	1	1	0	0	1	1	1	1	0	0	1	1	1	1	2	2	2	2	2	2	3	3	4	2	2	2	1
1	200 md/day	1	1	2	5	5	4	3	0	0	0	1	1	1	0	1	0	1	1	1	1	1	1	1	1	0	1	1	1	1	1	1	1	1	3	3	3	3	3	4	3	3	4	3	2	3	1
1	?	0	1	1	5	5	2	1	1	1	1	0	0	0	0	1	0	1	1	0	1	0	0	1	0	1	1	1	0	1	1	1	1	1	3	3	3	3	3	4	3	2	3	1	1	2	1
2			1	2	5	2	3	5	1	1	1	1	0	1	1	1	1	1	1	0	1	1	1	1	1	1	1	1	1	1	1	1	1	1	3	4	2	3	2	4	4	4	3	2	2	2	1
1	200	1	1	2	5	5	2	1	1	1	1	1	0	0	1	1	0	1	1	0	1	0	1	1	0	1	1	1	1	1	1	2	2	3	2	2	2	3	3	3	3	3	3	2	2	2	1
1	200	1	1	1	5	5	4	2	1	1	0	1	1	0	0	1	1	1	1	0	1	1	1	0	1	1	1	1	0	0	1	2	2	3	2	3	2	2	3	4	4	3	5	2	2	2	1
1	200	1	1	1	5	3	3	3	1	1	0	1	1	0	1	1	1	1	1	0	1	1	1	0	1	1	1	1	0	1	1	2	2	2	3	3	3	2	3	4	3	3	4	3	3	3	1
2			1	2	5	5	3	2	1	1	1	0	1	0	1	1	1	1	1	1	1	1	1	1	0	1	1	0	0	1	1	3	5	5	3	3	2	3	4	4	4	3	2	3	3	3	1
2	20	0	1	1	4	5	3	2	1	1	0	0	1	0	0	1	0	1	1	0	1	0	0	0	1	1	1	0	1	1	0	3	3	3	2	3	2	1	3	1	3	3	2	3	2	3	1
2	30	0	1	1	5	5	3	5	1	1	1	1	1	0	0	1	1	1	1	1	1	1	1	1	1	0	1	1	1	1	1	1	1	1	2	2	2	4	3	4	3	2	3	3	3	3	1
2			1	2	4	5	1	4	1	1	1	0	1	0	0	1	1	1	1	0	1	1	0	0	1	0	1	0	1	1	1	2	2	2	3	3	3	3	3	3	3	3	3	2	2	2	1
1	60	0	1	2	4	5	3	4	1	1	1	0	1	0	1	1	1	1	1	0	1	1	0	1	1	1	1	0	0	1	1	1	2	3	3	3	3	2	2	2	2	2	2	3	2	2	1
2			1	2	4	5	2	3	1	1	0	0	1	0	1	1	1	1	1	0	1	1	0	0	1	1	0	0	0	0	0	1	4	2	3	4	4	3	4	2	3	2	4	3	3	2	1
2			2	1	4	2	4	2	1	1	0	0	1	0	0	0	1	1	1	0	1	1	0	0	1	1	1	0	0	0	1	3	3	4	3	3	3	2	2	2	3	3	4	3	3	3	1
2	30	0	1	2	5	5	3	2	1	1	1	0	0	0	1	0	1	1	1	0	1	1	1	1	1	0	0	1	0	0	1	1	2	2	4	3	3	3	3	3	3	2	2	3	3	3	1
1	200	1	1	1	4	1	4	1	1	0	1	1	1	0	1	1	1	1	1	1	1	0	0	1	1	1	1	0	1	1	1	1	2	2	2	2	3	2	2	4	3	2	3	3	3	3	1
2	any dose	0	1	2	5	2	3	4	1	1	1	1	1	1	1	1	1	1	1	0	1	1	0	0	1	0	1	1	1	1	1	1	1	2	2	2	3	2	3	3	3	3	3	2	2	2	1
2	1	0	1	2	4	5	3	5	1	0	0	1	0	1	0	1	1	1	1	1	0	1	1	0	1	1	1	0	1	1	1	1	1	1	2	2	2	2	2	2	3	3	4	3	3	3	1
2	?	0	1	2	4	5	3	1	1	1	0	1	1	1	1	1	0	1	1	1	1	1	1	0	1	0	1	0	0	0	0	1	2	2	3	3	3	2	2	2	3	3	3	3	3	3	1
2			1	2	5	5	3	3	1	0	0	0	0	1	0	1	1	1	1	0	1	1	0	0	1	1	1	1	1	0	1	1	1	1	3	3	3	3	3	4	3	3	4	3	2	1	1
2			1	2	5	5	3	4	1	1	0	0	1	0	0	1	1	1	1	0	1	1	0	1	1	1	1	1	1	0	1	1	2	4	1	2	3	2	3	3	3	3	4	1	1	2	1
1	200	1	1	2	5	5	2	4	1	1	1	1	0	0	0	0	1	1	1	0	1	1	0	1	1	1	1	0	1	1	1	1	2	2	3	4	3	2	3	3	4	2	3	2	2	2	1
2	N/A	0	1	1	5	5	3	3	1	1	0	0	1	0	0	1	0	1	1	0	1	1	0	0	1	1	1	1	0	0	0	1	2	2	2	2	2	2	3	4	2	2	2	3	3	3	1
1	60	0	1	2	5	5	4	2	1	0	0	0	1	1	0	1	1	1	1	0	1	1	1	0	1	1	0	1	1	1	0	1	1	2	3	4	3	4	5	5	4	4	5	3	2	2	1
2			1	2	5	1	2	4	1	1	0	1	0	0	0	1	0	1	1	0	1	1	1	1	1	0	1	1	1	1	0	2	3	2	2	3	3	2	3	3	3	1	3	2	2	2	1
2			1	2	4	2	3	2	1	1	0	1	0	1	1	0	0	1	1	1	0	1	1	1	1	0	1	0	1	0	0	3	3	3	3	3	3	2	3	2	3	3	3	3	3	3	1
1	200	1	1	2	5	2	1	2	1	1	1	1	0	0	1	0	1	1	1	0	1	1	0	1	1	1	1	0	0	1	1	1	1	1	1	3	2	1	3	3	2	3	2	3	2	2	1
1	200	1	1	1	5	4	3	3	1	1	0	0	0	0	0	1	1	1	1	0	1	1	0	0	1	0	1	1	0	1	1	2	3	2	3	4	4	3	4	4	3	3	3	3	3	3	1
2			1	2	4	5	4	1	1	1	0	1	1	1	0	1	0	1	1	1	1	1	1	0	1	1	1	0	1	0	1	2	3	3	3	3	3	2	3	3	3	2	3	3	3	3	1
2	40	0	1	2	4	5	3	2	1	1	1	0	0	1	0	1	0	1	0	1	1	1	0	0	0	1	0	1	1	1	1	1	2	2	2	3	3	2	3	3	3	3	3	2	2	2	1
1	200	1	1	1	4	1	3	3	1	1	0	0	0	1	1	1	0	1	1	1	1	1	1	1	1	1	1	0	1	1	1	2	4	3	2	3	3	3	4	5	3	3	3	3	3	3	1
1	200	1	1	2	4	1	4	2	1	1	1	0	0	1	1	1	0	1	1	0	1	1	1	0	1	0	1	0	1	1	1	1	1	1	4	3	3	4	4	4	3	3	3	3	3	3
1	Not known	0	2	1	4	5	3	2	1	0	1	0	1	1	0	1	0	1	1	1	1	0	1	1	1	1	1	1	1	1	1	2	4	3	2	3	2	2	3	2	2	2	3	3	3	3	1
1	50	0	1	2	5	5	3	2	1	0	0	1	0	0	0	1	0	1	0	1	1	1	1	0	1	1	1	1	1	0	1	2	3	2	3	4	3	4	3	4	3	3	3	2	2	2	1
1	200	1	1	1	5	5	3	4	1	1	0	1	0	1	0	1	0	1	0	0	1	1	0	1	1	1	1	1	0	1	1	1	1	1	3	4	4	4	4	4	3	3	3	3	3	1	1
2			1	2	5	3	3	2	1	1	0	1	0	0	1	1	0	1	0	0	1	1	1	1	0	0	1	0	1	1	1	1	1	1	2	2	3	3	4	3	3	2	3	3	2	2	1
2			1	2	5	2	2	3	1	1	1	0	0	0	1	1	1	1	0	0	1	1	1	0	1	0	1	0	0	1	1	1	1	3	4	4	4	4	4	4	3	3	3	1	1	3	1		1
1	200	1	1	2	5	3	4	1	1	1	0	0	0	1	1	1	1	1	0	0	0	1	0	0	1	0	1	1	0	0	1	1	1	1	3	3	3	3	4	4	3	3	3	3	3	3	1
2	20	0	1	2	4	5	2	2	0	1	0	1	0	1	0	1	1	1	1	0	1	0	1	0	1	1	1	1	0	1	1	2	3	3	3	3	2	3	4	4	3	3	2	2	1	3	1
2			1	1	4	1	2	3	1	0	1	1	1	1	0	1	0	1	0	0	1	0	1	0	1	1	1	0	0	1	1	1	3	2	2	3	2	1	3	3	3	3	3	3	3	2	1
2			1	2	5	5	3	3	1	0	0	1	0	0	1	1	0	1	1	1	1	1	0	1	1	0	1	1	1	0	1	1	1	1	3	3	2	2	4	5	3	2	4	3	3	2	1
2	60	0	1	2	4	3	3	5	1	1	1	0	0	1	1	1	0	1	1	0	1	0	1	1	1	1	1	1	1	1	1	2	2	2	3	3	3	3	3	3	2	3	3	2	2	2	1
1	60-120	0	1	1	4	4	4	4	1	1	0	0	1	1	0	1	1	1	0	0	1	0	0	0	1	0	1	1	0	1	1	3	3	3	2	3	2	2	1	1	3	3	4	3	3	3	1
1	200	1	1	2	4	3	4	5	1	1	1	0	1	0	1	1	1	1	1	0	1	0	0	0	1	1	1	1	0	0	1	2	3	2	4	4	3	3	3	3	3	3	3	2	2	2	1
2	100	0	1	2	5	1	3	2	1	1	1	1	0	1	0	0	0	1	1	1	1	1	1	0	1	0	1	0	1	1	0	4	4	4	3	3	3	4	4	4	3	3	3	2	2	2	1
2			1	2	5	5	3	2	0	0	0	1	0	0	1	0	1	0	0	0	1	1	0	0	0	1	0	1	0	0	0	2	2	3	2	3	2	2	3	4	4	4	3	2	3	3	1
1			1	2	5	1	2	5	1	1	0	0	1	0	0	1	0	1	1	0	1	1	0	0	1	0	1	0	1	1	0	3	3	2	3	3	3	3	3	4	3	3	2	2	2	2	1
2	50	0	1	1	4	5	3	3	1	1	0	0	1	1	1	0	1	0	1	1	1	0	0	0	0	0	0	1	0	0	1	2	2	4	3	4	3	3	3	3	3	3	4	2	2	2	1
1	20	0	1	1	5	3	3	2	1	1	0	1	0	1	0	0	0	1	0	1	1	1	0	1	1	1	1	1	1	0	1	1	4	3	4	4	4	3	3	3	3	2	3	2	2	2	1
[truncated: 3 more columns]

## Sheet: Sheet2
Variable	Description	Coding
Opiod management variables
Familiar with Canadian guideline	Are you familiar with the Canadian guideline for safe and effective opioid use in chronic non-cancer pain?	1=yes 2=N0
Watchful dose	What is the guideline recommended "watchful dose" per day for opioids? (mg morphine equivalents)
dose	dose variable Dichotomized	0= different than 200/ 1=200
inadvertent overdoses	The number of inadvertent overdoses related to prescription opioids has been increasing in Ontario.	1=Yes 2=No
addicted	Patients will not become addicted to their prescription opioid if they have a legitimate pain problem.	1=Yes 2=No
Demographic variables
gender	Demographic gender	4=male 5=female
years worked in Canada	how many years have you worked as pharmacists in Canada?	1=<5 2=5-10 3= 11-15 4=16-20 5=>20
Hours	How many hours do you work in a community/FHT on a weekly basis?	1= <8hrs 2=8-24 3=25-40 4=>40
population size	What is the population size of the city/town you practice in?	1= Rural (<10,000), 2= Small Urban (10,000-100,000), 3= Medium Urban (100,001-250,000) 4- Large Urban ( 250,001-750,000), 5= Metropolitan (>750,000).
Edu1	education BSc	1= BSC
Edu2	Entry-Level PharmD	1= Entry level PharmD
Edu3	PharmD	1= PharmD
Edu4	Residency trained	1=Residency trained
Edu5	Fellowship trained	1=Fellowship trained
Edu6	MScPhm	1=MscPhm
Knowledge variables
KLBP1	Chronic low back pain is always related to injury	0= false 1= true
KLBP2	Chronic low back pain can be described as, "aching, burning, stabbing, tingling, dull or sharp"	0= false 1= true
KLBP3	Back pain usually gets worse before it gets better	0= false 1= true
KLBP4	Bed rest is helpful	0= false 1= true
KLBP5	Appropriate dose of morphine for pain is whatever dose relieves the pain as completely as possible	0= false 1= true
KLBP6	Treatment with non-prescription analgesics should be first-line	0= false 1= true
KLBP7	Patients should avoid all painful movements	0= false 1= true
KLBP8	Chronic ibuprofen use can worsen blood pressure	0= false 1= true
KHD1	Migraine is primarily a disease of the brain, with a well-established neurological basis.	0= false 1= true
KHD2	Muscular factors and stress are contribute to pathophysiology of chronic tension type headaches	0= false 1= true
KHD3	Migraine patients should be asked if headaches inhibit work, school and household tasks	0= false 1= true
KHD4	severe migraines try non-prescription medications then prescription medications	0= false 1= true
KHD5	Headache sufferers should guard against medication over-use	0= false 1= true
KHD6	Prophylactic drug therapy is recommended for chronic headaches	0= false 1= true
KHD7	Combination analgesics with codeine are reasonable first-line options	0= false 1= true
KHD8	Triptans should be reserved for patients who have failed at least two other prescription medications	0= false 1= true
KPN1	PDN is a result of damage to nerves in a hyperglycemic environment.	0= false 1= true
KPN2	PDN results from both peripheral and central sensitization mechanisms.	0= false 1= true
KPN3	All patients with diabetes will develop painful diabetic neuropathy	0= false 1= true
KPN4	Optimal glycemic control is the cornerstone of treatment	0= false 1= true
KPN5	Tramadol is a reasonable initial treatment option	0= false 1= true
KPN6	A reasonable starting dose for gabapentin	0= false 1= true
KPN7	Tricyclic antidepressants are effective	0= false 1= true
Attiude variables
To incorporate complementary treatment (Chronic low back pain	How improtant is it to incorporate complimentary treatment for the following disorder (LBP)?	1= Very important 2= Important 3=Moderately important 4= of little importance 5= Unimportant
To incorporate complementary treatment (Chronic headache disorders	How improtant is it to incorporate complimentary treatment for the following disorder (CHD)?	1= Very important 2= Important 3=Moderately important 4= of little importance 5= Unimportant
To incorporate complementary treatment (Painful diabetic neuropathy	How improtant is it to incorporate complimentary treatment for the following disorder (PDN)?	1= Very important 2= Important 3=Moderately important 4= of little importance 5= Unimportant
under-dosing Chronic low back pain	How often in under-dosing patients with analgesics the reason for an ongoing pain in LBP?	1= Always 2= Very often 3= Sometimes 4= Rarely 5= Never
under-dosing Chronic headache disorders	How often in under-dosing patients with analgesics the reason for an ongoing pain in CHD?	1= Always 2= Very often 3= Sometimes 4= Rarely 5= Never
under-dosing Painful diabetic neuropathy	How often in under-dosing patients with analgesics the reason for an ongoing pain in PDN?	1= Always 2= Very often 3= Sometimes 4= Rarely 5= Never
opioids important- Chronic low back pain	How important are opioids in the treatment of LBP?	1= Very important 2= Important 3=Moderately important 4= of little importance 5= Unimportant
opioids important- Chronic headache disorders	How important are opioids in the treatment of CHD?	1= Very important 2= Important 3=Moderately important 4= of little importance 5= Unimportant
opioids important- Painful diabetic neuropathy	How important are opioids in the treatment of PDN?	1= Very important 2= Important 3=Moderately important 4= of little importance 5= Unimportant
improvement -Chronic low back pain	How much improvement do you expect from your patients regarding LBP?	1= full improvement 2= Major improvement 3= Moderate improvement 4= Little improvement 5= No improvement
improvement-Chronic headache disorders	How much improvement do you expect from your patients regarding CHD?	1= full improvement 2= Major improvement 3= Moderate improvement 4= Little improvement 5= No improvement
improvement-Painful diabetic neuropathy	How much improvement do you expect from your patients regarding PDN?	1= full improvement 2= Major improvement 3= Moderate improvement 4= Little improvement 5= No improvement
feel when approached-Chronic low back pain	How do yOu feel when approached by patients regarding LBP?	1= Burdensome 2= Neutral 3= Comfortable
feel when approached-Chronic headache disorders	How do yOu feel when approached by patients regarding CHD?	1= Burdensome 2= Neutral 3= Comfortable
feel when approached-Painful diabetic neuropathy	How do yOu feel when approached by patients regarding PDN?	1= Burdensome 2= Neutral 3= Comfortable
